# Supplementary material for: Structural modifications induced by the switch from an endogenous bis-histidyl to an exogenous cyanomet hexa-coordination in a tetrameric haemoglobin
Source: Royal Society of Chemistry journal article supplement (doi:10.1039/c4ra03317e), 2014-01-01
Supplement: c4ra03317e1.pdf [file c4ra03317e1.pdf]

## Supplementary material

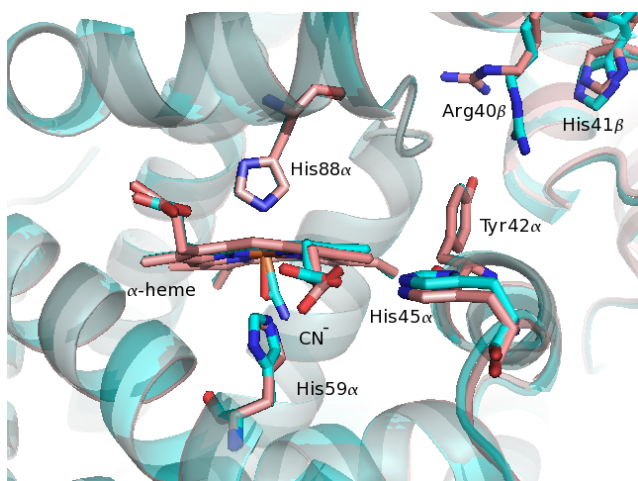

**Fig. S1** Inset from Figure 3. Structural modifications of HbTb structure upon cyanidation at the  $\alpha$  heme.

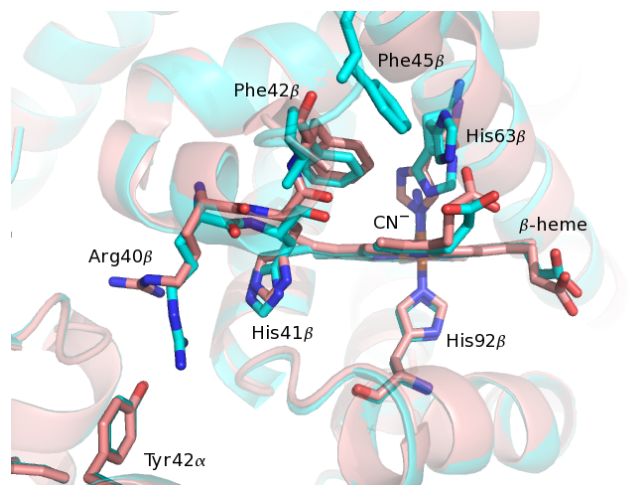

**Fig. S2** Inset from Figure 3. Structural modifications of HbTb structure upon cyanidation at the  $\beta$  heme

**Table S1** Data collection and refinement statistics.

| <i>Diffraction data</i>                           |                         |
|---------------------------------------------------|-------------------------|
| Space group                                       | C2                      |
| Cell parameters                                   |                         |
| a (Å)                                             | 86.88                   |
| b (Å)                                             | 87.88                   |
| c (Å)                                             | 55.25                   |
| $\beta$ (°)                                       | 99.66                   |
| Resolution range (Å)                              | 30.00-1.54 (1.60-1.54)* |
| No. of unique reflections                         | 61743                   |
| Completeness (%)                                  | 98.8 (96.7)*            |
| Rmerge (%)                                        | 4.2 (22.3)*             |
| $I/\sigma(I)$                                     | 22.9 (3.8)              |
| Redundancy                                        | 5                       |
| <i>Refinement</i>                                 |                         |
| Resolution range (Å)                              | 30.00-1.54              |
| R (%)                                             | 16.5                    |
| $R_{\text{free}}$ (%)                             | 19.7                    |
| No. of atoms                                      | 2320                    |
| No. of water molecules                            | 405                     |
| <i>r.m.s. deviation</i>                           |                         |
| Bond lengths (Å)                                  | 0.016                   |
| Bond angles (°)                                   | 1.529                   |
| <i>Ramachandran statistics</i>                    |                         |
| Residues in favoured region (%)                   | 93.8                    |
| Residues in allowed region (%)                    | 6.2                     |
| Residues in generously allowed/outlier region (%) | 0/0                     |

55 \*)The numbers in parentheses refer to the outermost shell

35

40

45

50
